# Supplementary material
Source: PubMed Central journal article supplement (PMC6587036)

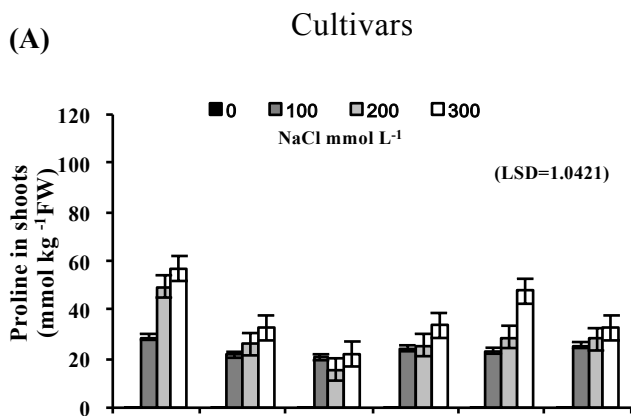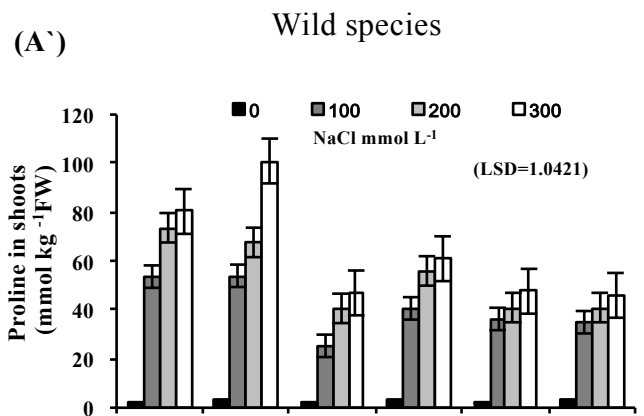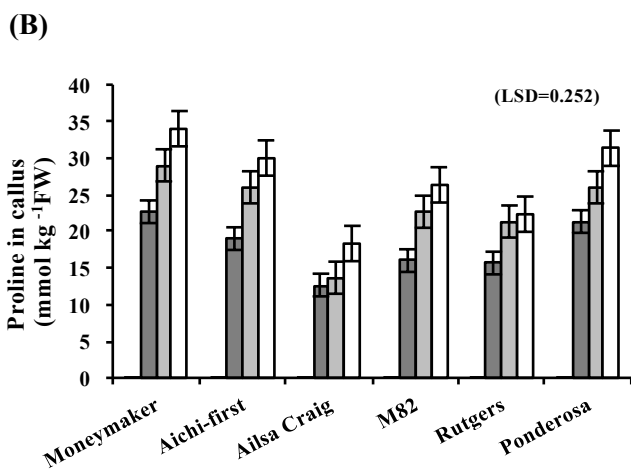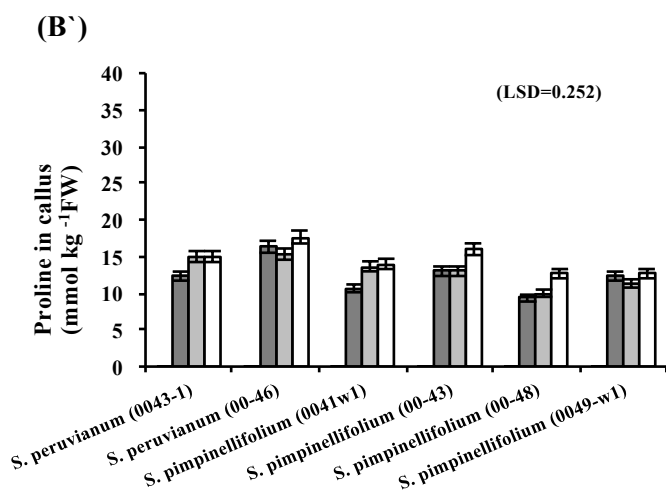

Supplement: plantbiotechnology-33-5-16.1006a-s001.pdf [file plantbiotechnology-33-5-16.1006a-s001.pdf]
